# Supplementary material for: Solution and solid state structures of uranium(III) and lanthanum(III) iodide complexes of tetradentate tripodal neutral N-donor ligands †
Source: Royal Society of Chemistry journal article supplement (doi:10.1039/b004179n), 2000-01-01
Supplement: b004179n.doc [file b004179n.doc]

Table S1. 1H NMR Chemical Shifts at 298 K of tpa complexes (*: non assigned, b: broad)

| solvent | compound | **H6** | **H5** | **H4** | **H3** | **CH2** |
| --- | --- | --- | --- | --- | --- | --- |
| pyridine | tpa | 8.52 | 7.60 | 7.45 | 6.98 | 3.984 |
|  | La(tpa)I3 | 9.56 | 6.80 | 7.35 | 7.10 | 4.59 |
|  | La(tpa)2I3 | 8.62 | 6.98 | 7.47 | * | 5.04 |
|  | U(tpa)I3 | 15.14 | 7.82 | 15.78 | 10.18 | 0.12 |
|  | U(tpa)2I3 | -2.83 | 3.62 | 13.29 | 11.13 | 7.23 |
| CD3CN | tpa | 8.51 | 7.74 | 7.47 | 7.24 | 3.83 |
|  | La(tpa)I3 | 9.42 | 7.48 | 7.94 | 7.48 | 4.62 |
|  | La(tpa)2I3 | 8.38 | 7.33 | 8.01 | 7.67 | 4.70 |
|  | U(tpa)I3 | 11.06 | 7.23 | 15.31 | 9.67 | 2.28 |
|  | U(tpa)2I3 | 2.21 | 4.38 | 13.05 | 4.38 | 11.72 |

Table S2. 1H NMR Chemical Shifts at 298 K of ntb complexes (*: non assigned, b: broad)

|  | H6 | H5 | H4 | H3 | CH2 | NH |
| --- | --- | --- | --- | --- | --- | --- |
| La(ntb)I3 | 7.75 | * | * | 6.98 | 5.67 | 15.35 |
| La(ntb)2I3 | 7.31 | 6.62 | 6.82 | 7.02 | 6.2b | 15.35 |
| U(ntb)I3 | 10.20 | * | * | 7.84 | -6.51 | 17.15 |
| U(ntb)2I3 | 7.34 | 6.94 | 8.23 | 8.23 | -7.39  -7.89 | 17.15 |

Experimental X-ray Crystallography:

The cell parameters were obtained with intensities detected on three batches of 15 frames with a 10 s exposure time for each. The crystal-detector distance was 5 cm. For three settings of  and 2, 1200 narrow data frames were collected for 0.3° increments in . A full hemisphere of data was collected for each complex. At the end of data collection, the first 50 frames were recollected to establish that crystal decay had not taken place during the collection.
